# Supplementary material
Source: Springer Nature journal article supplement (https://www.springermedizin.de/resource/supplementary/12889_2013_6172_MOESM1_ESM.pdf/9498318)
Supplement: MOESM1 [file 9498318]

Pubmed  
(n= 21)

Embase  
(n= 21)

Psycinfo  
(n= 11)

other sources  
(n= 17)

n= 70

Removal of duplicates

Title and abstract screening  
n= 54

Excluded:  
n= 13

Full- text screening  
n= 41

Excluded:  
n= 22

Included: n= 19
